# Supplementary material for: Optimizing stem-loop qPCR assays through multiplexed cDNA synthesis of U6 and miRNAs
Source: PubMed Central journal article supplement — Plant Signal Behav. 2014 May 5;8(8):e24918. doi: 10.4161/psb.24918 (PMC4010539; doi:10.4161/psb.24918), 2014-05-05
Supplement: psb-8-e24918-s01.pdf [file psb-8-e24918-s01.pdf]

## **Supplemental Material to:**

**Marie Turner, Sajag Adhikari and Senthil Subramanian**

**Optimizing stem-loop qPCR assays through multiplexed  
cDNA synthesis of U6 and miRNAs**

**Plant Signaling & Behavior 2013; 8(8)**

**<http://dx.doi.org/10.4161/psb.24918>**

**[www.landesbioscience.com/journals/psb/article/24918](http://www.landesbioscience.com/journals/psb/article/24918)**

**A**

CLUSTAL 2.1 multiple sequence alignment

```

Oryza_sativa_cv_japonica      GTCTCTTCGGGAGACATCCGATAAAAATTGGAACGATACAGAGAAGATTAGC 50
Zea_mays                      GTCTCTTCGGGAGACATCCGATAAAAATTGGAACGATACAGAGAAGATTAGC 50
Triticum_aestivum            GCCCCTTCGGGGACATCCGATAAAAATTGGAACGATACAGAGAAGATTAGC 50
Broad_bean                   ----CTTCGGGGACATCCGATAAAAATTGGAACGACACAGAGAAGATTAGC 46
Medicago_truncatula         GTCCCTTTGGGGACATCTGATAAAAATTGGAACGATACAGAGAAGATTAGC 50
Arabidopsis_thaliana         GTCCCTTCGGGGACATCTGATAAAAATTGGAACGATACAGAGAAGATTAGC 50
                               *** ** ***** *****

Oryza_sativa_cv_japonica      ATGGCCCTGCGCAAGGATGACACGCACAAATCGAGAAATGGTCCAAATT 100
Zea_mays                      ATGGCCCTGCGCAAGGATGACACGCACAAATCGAGAAATGGTCCAAATT 100
Triticum_aestivum            ATGGCCCTGCGCAAGGATGACACGCACAAATCGAGAAATGGTCCAAATT 100
Broad_bean                   ATGGCCCTGCGCAAGGATGACACGCACAAATCGAGAAATGGTCCAAATT 96
Medicago_truncatula         ATGGCCCTGCGCAAGGATGACACGCACAAATCGAGAAATGGTCCAAATT 100
Arabidopsis_thaliana         ATGGCCCTGCGCAAGGATGACACGCATAAATCGAGAAATGGTCCAAATT 100
                               ***** *****

Oryza_sativa_cv_japonica      TTT----- 103
Zea_mays                      TTTT----- 105
Triticum_aestivum            TTTTGGAGATT 111
Broad_bean                   TT----- 98
Medicago_truncatula         TTT----- 103
Arabidopsis_thaliana         TTT----- 103
                               **

```

**B****Primer Sequences:**

U6 cDNA synthesis primer: 5'-GTGCAGGGTCCGAGGTTTTGGACCATTCTCGAT-3'

U6 qPCR forward primer: 5'-GGAACGATACAGAGAAGATTAGCA-3'

Universal qPCR reverse primer: 5'-GTGCAGGGTCCGAGGT-3'

**Figure S1.** U6 primer design. **A.** Sequence alignment of U6 sequences from multiple plant species showing a conserved region from which qPCR primers were designed. U6 sequences from multiple plant species were obtained from non-coding RNA database (<http://www.ncrna.org/frnadb/>), NCBI and ncRNAdb. Sequences used to design "Forward" and "Reverse" primers are underlined. **B.** Novel U6 primer sequences designed in this study for multiplexed cDNA synthesis and qPCR. The universal qPCR primer is from Varkonyi-Gasic et al (2007).
